# Supplementary material for: Chinese Herbal Medicine Combined With Antiepileptic Drugs for Intractable Epilepsy: A Systematic Review and Meta-Analysis of Randomized Controlled Trials
Source: Frontiers journal article supplement (doi:10.3389/fphar.2022.917099), 2022-07-20

## Supplementary Online Content

Ying Zhao, Jialin Liu, Qingxuan Liu, Mengwei Wu, Siyuan Yuan, Weiwei Xu, Ying Wang, Kaiyue Wang, Lili Li, Hufang Zhou, Jinmin Liu. Chinese Herbal Medicine Combined With Antiepileptic Drugs for Intractable Epilepsy: A Systematic Review and Meta-Analysis of Randomized Controlled Trials

**eMethod.** Search Strategy

**eTable 1.** List of studies excluded at full-text screening stage

**eTable 2.** Meta-regression of sources of heterogeneity in included studies which reported monthly seizure frequency

**eFigure 1.** Sensitivity analysis of monthly seizure frequency in patients with IE treated by combination of CHM and AEDs

**eFigure 2.** Sensitivity analysis of abnormal rate of EEG in patients with IE treated by combination of CHM and AEDs

**eFigure 3.** Sensitivity analysis of adverse events in patients with IE treated by combination of CHM and AEDs

## **e Methods. Search Strategy**

Search strategy for Medline Database (September 14, 2021)

#1 "Medicine, Chinese Traditional"[Mesh]

#2 "Drugs, Chinese Herbal"[Mesh]

#3 (((((((((((traditional Chinese medicine[Title/Abstract]) OR (TCM[Title/Abstract])) OR (Chinese herbal compound[Title/Abstract])) OR (Herbal medicine[Title/Abstract])) OR (Chinese patent medicine[Title/Abstract])) OR (Chinese herbal[Title/Abstract])) OR (Chinese medicine[Title/Abstract])) OR (Chinese proprietary medicine[Title/Abstract])) OR (Chinese proprietary drug[Title/Abstract])) OR (Chinese patent drug[Title/Abstract])) OR (complementary[Title/Abstract])) OR (alternative medicine[Title/Abstract])) OR (CAM[Title/Abstract])

#4 #1 OR #2 OR #3

#5 "Drug Resistant Epilepsy"[Mesh]

#6 (((((((((((Drug Resistant Epilepsy[Title/Abstract]) OR (Drug Resistant Epilepsies[Title/Abstract])) OR (Medication Resistant Epilepsy[Title/Abstract])) OR (Medication Resistant Epilepsies[Title/Abstract])) OR (Intractable Epilepsy[Title/Abstract])) OR (Intractable Epilepsies[Title/Abstract])) OR (Refractory Epilepsy[Title/Abstract])) OR (Refractory Epilepsies[Title/Abstract])) OR (Drug Refractory Epilepsy[Title/Abstract])) OR (Drug Refractory Epilepsies[Title/Abstract])) OR (Medically refractory epilepsy[Title/Abstract])) OR (drug-resistant epilepsy[Title/Abstract])) OR (temporal lobe epilepsy[Title/Abstract])

#7 #5 OR #6

#8 randomized controlled trial [pt]

#9 controlled clinical trial [pt]

#10 randomized [tiab]

#11 placebo [tiab]

#12 drug therapy [sh]

#13 randomly [tiab]

#14 trial [tiab]

#15 groups [tiab]

#16 #8 OR #9 OR #10 OR #11 OR #12 OR #13 OR #14 OR #15

#17 animals [mh] NOT humans [mh]

#18 #16 NOT #17

#19 #4 AND #7 AND #18

**e Table 1. List of studies excluded at full-text screening stage**

| Number | Author      | Title                                                                                                                                                            | Reason                         |
|--------|-------------|------------------------------------------------------------------------------------------------------------------------------------------------------------------|--------------------------------|
| 1      | Bo, L. K.   | Therapeutic effect observation on the treatment of 64 cases of intractable epilepsy major with adjunctive therapy of Shenpu Decoction                            | No outcome data for extraction |
| 2      | Shu, J.     | Clinical observation on adjuvant treatment of refractory epilepsy with Chaibei Zhixian Decoction                                                                 | No outcome data for extraction |
| 3      | Nie, L. Y.  | Clinical study of the combination of Chaibei Zhixian Decoction with anti-epilepsy drugs in the treatment of intractable epilepsy complex partial seizures        | No outcome data for extraction |
| 4      | Yang, M. Q. | To analyze the safety of Chaibei Zhixian Decoction in treating refractory epilepsy                                                                               | No outcome data for extraction |
| 5      | Wang, B.    | Clinical observation of Xuefu Zhuyu Decoction in treating intractable epilepsy caused by brain trauma                                                            | No outcome data for extraction |
| 6      | Zhang, J.   | Clinical observation on refractory epilepsy treated by integrated Traditional Chinese and Western medicine                                                       | No outcome data for extraction |
| 7      | He, X. Y.   | Clinical observation on treating intractable epilepsy with integrated traditional Chinese and Western Medicine                                                   | No outcome data for extraction |
| 8      | Wu, Y.      | Clinical observation on refractory epilepsy treated by integrated Traditional Chinese and Western medicine                                                       | No outcome data for extraction |
| 9      | Xiao, J. F. | Clinical observation on refractory epilepsy with heart-kidney-yang deficiency treated by integrated Chinese and Western medicine                                 | No outcome data for extraction |
| 10     | Chen, C. P. | Clinical observation of Chaihu Shugan Decoction combined with Guipi Decoction in treating refractory epilepsy syndrome of Liver depression and spleen deficiency | No outcome data for extraction |
| 11     | Wang, X. H. | Randomized controlled trial of Chaibei Zhixian Granules in the treatment of refractory epilepsy                                                                  | No outcome data for extraction |
| 12     | Wang, Q. X. | Clinical observation on 78 cases of refractory epilepsy treated with Zhenhuang Pingxian Pill and Dianjianan                                                      | No outcome data for extraction |
| 13     | He, Q. C.   | Effect of Chaihu Shugan decoction for intractable epilepsy and curative effect of related factors                                                                | No outcome data for extraction |

|    |              |                                                                                                                                                                           |                                                  |
|----|--------------|---------------------------------------------------------------------------------------------------------------------------------------------------------------------------|--------------------------------------------------|
| 14 | Liu, Y. X.   | Clinical analysis of 72 epileptic patients treated with alkaline extract of <i>Euphorbia fisheriana</i>                                                                   | Participants did not meet the inclusion criteria |
| 15 | Sun, Y. D.   | Clinical observation of Shaoxing Zhixian tablet in the treatment of epilepsy                                                                                              | Participants did not meet the inclusion criteria |
| 16 | Xiao, H. Q.  | Effect of Bupleurum plus Longgu Oyster Decoction on SOD and MDA in patients with temporal lobe epilepsy                                                                   | Participants did not meet the inclusion criteria |
| 17 | Yang, X. H.  | Efficacy and safety analysis of Bupleurum plus Longgu Oyster Decoction combined with oxazepine in the treatment of temporal lobe epilepsy                                 | Participants did not meet the inclusion criteria |
| 18 | Zhou, B.     | Effects of Bupleurum plus Longgu Oyster Decoction on EEG and serum NGF and BDNF levels in patients with temporal lobe epilepsy                                            | Participants did not meet the inclusion criteria |
| 19 | Li, H. X.    | Clinical observation of Jiawei Chaihu Shugan Decoction combined with carbamazepine in the treatment of temporal lobe epilepsy with qi stagnation and spittoon coagulation | Participants did not meet the inclusion criteria |
| 20 | Chen, A. L.  | Clinical observation of modified Chaihu Shugan Powder combined with carbamazepine in the treatment of eclampsia with wind-phlegm closure                                  | Participants did not meet the inclusion criteria |
| 21 | Cao, J.      | Study on the quality of life and seizure control of temporal lobe epilepsy treated by resolving phlegm and dispelling wind                                                | Participants did not meet the inclusion criteria |
| 22 | Zhang, J. D. | Clinical observation of 102 cases of refractory epilepsy treated by integrated traditional Chinese and western medicine                                                   | Participants did not meet the inclusion criteria |
| 23 | Wang, B. J.  | Clinical analysis of Chinese and western combined comprehensive treatment for refractory epilepsy                                                                         | Interventions did not meet the inclusion         |
| 24 | Fan, W. T.   | Clinical observation on the treatment of refractory epilepsy with Chinese and western integrated treatment                                                                | Interventions did not meet the inclusion         |
| 25 | Wu, H. M.    | Antioxidant and Anticonvulsant Effect of a Modified Formula of Chaihu-Longu-Muli-Tang                                                                                     | not RCT                                          |
| 26 | Xiao, D. P.  | Clinical observation of Pinggan Zhixian Prescription combined with western medicine in the treatment of refractory epilepsy                                               | not RCT                                          |

|    |              |                                                                                                                                                                        |                       |
|----|--------------|------------------------------------------------------------------------------------------------------------------------------------------------------------------------|-----------------------|
| 27 | Wu, C. H.    | A randomized parallel-controlled study of Chaibei Zhixian Decoction combined with western medicine in the treatment of complex partial seizures of refractory epilepsy | not RCT               |
| 28 | Gao, Y.      | Effect analysis of Xuefu Zhuyu Decoction on refractory epilepsy caused by brain trauma                                                                                 | not RCT               |
| 29 | Deng, Y.     | 30 cases of Zhixian Decoction in the treatment of refractory epilepsy                                                                                                  | not RCT               |
| 30 | Huang, Y. J. | Clinical observation on 118 cases of refractory epilepsy treated by integrated traditional Chinese and western medicine                                                | not RCT               |
| 31 | Huang, Y. S. | Observation on curative effect of Chaihu Shugan Decoction in treatment of 108 cases of primary epilepsy                                                                | not RCT               |
| 32 | Liu, Z. F.   | Clinical observation on the treatment of refractory grand epilepsy by Xianfukang                                                                                       | not RCT               |
| 33 | Xue, X. H.   | Clinical observation of 85 cases of refractory epilepsy treated by Chinese medicine "Diankexing"                                                                       | not RCT               |
| 34 | Zuo, T. X.   | Clinical and experimental study of "Zhixian Decoction" in treating refractory epilepsy                                                                                 | not RCT               |
| 35 | Chen, M.     | Clinical observation on treating 61 cases of refractory epilepsy with Qutan Dingxian Decoction                                                                         | not RCT               |
| 36 | Okabe, T.    | Clinical observation of the use of herbal medicine together with anti-convulsive medicine for intractable epilepsy                                                     | not RCT               |
| 37 | Wang, X. H.  | Randomized controlled trial of adding Chaibei Zhixian granules in the treatment of refractory epilepsy and its mechanism on P-GP and PXR                               | duplicate publication |
| 38 | Zhang, Y. G. | Observation on curative effect of refractory epilepsy treated by integrated traditional Chinese and western medicine                                                   | duplicate publication |
| 39 | Chen, C. P.  | Clinical observation of Chaihu Shugan Decoction combined with Guipi Decoction in treating refractory epilepsy syndrome of Liver depression and spleen deficiency       | duplicate publication |

|    |             |                                                                                                                                          |                       |
|----|-------------|------------------------------------------------------------------------------------------------------------------------------------------|-----------------------|
| 40 | Yu, J. B.   | Clinical study on treating refractory epilepsy with Qingxin Wendan Decoction                                                             | duplicate publication |
| 41 | He, Q. C.   | Effect of Chaihu Shugan Decoction on refractory epilepsy and related factors of curative effect                                          | duplicate publication |
| 42 | Wang, H. X. | Clinical analysis of combined Chinese and western treatment of refractory epilepsy                                                       | full text unavailable |
| 43 | Yin, L. P.  | 100 cases of intractable epilepsy treated by integrated traditional Chinese and western medicine                                         | full text unavailable |
| 44 | Liu, Z. F.  | Clinical and experimental study of Zhixian Decoction in treating refractory epilepsy (grand seizure)                                     | full text unavailable |
| 45 | Wang, W. M. | Clinical study on repairing abnormal perfusion foci of epileptic patients with traditional Chinese medicine assisted antiepileptic drugs | full text unavailable |
| 46 | Wu, Y.      | Clinical observation on refractory epilepsy treated by integrated Traditional Chinese and Western medicine                               | Used mistaken data    |
| 47 | He, X. Y.   | Clinical observation on treating intractable epilepsy with integrated traditional Chinese and Western Medicine                           | Used mistaken data    |

---

Abbreviations: IE, intractable epilepsy; RCTs, randomized controlled trials.

**e Table 2. Meta-regression of sources of heterogeneity in included studies which reported monthly seizure frequency**

|                     | $\beta$ | 95% CI      |             | <i>P</i> value |
|---------------------|---------|-------------|-------------|----------------|
|                     |         | Lower Limit | Upper Limit |                |
| numbers of subject  | 0.46    | -0.03       | 0.05        | 0.664          |
| treatment duration  | -1.74   | -1.01       | 0.17        | 0.132          |
| interventions       | 1.44    | -0.41       | 1.57        | 0.199          |
| JADAD scores        | 0.14    | -1.64       | 1.84        | 0.896          |
| diagnostic criteria | 0.16    | -0.55       | 0.63        | 0.875          |

Abbreviations: CI, confidence intervals.

**e Figure 1. Sensitivity analysis of monthly seizure frequency in patients with IE treated by combination of CHM and AEDs**

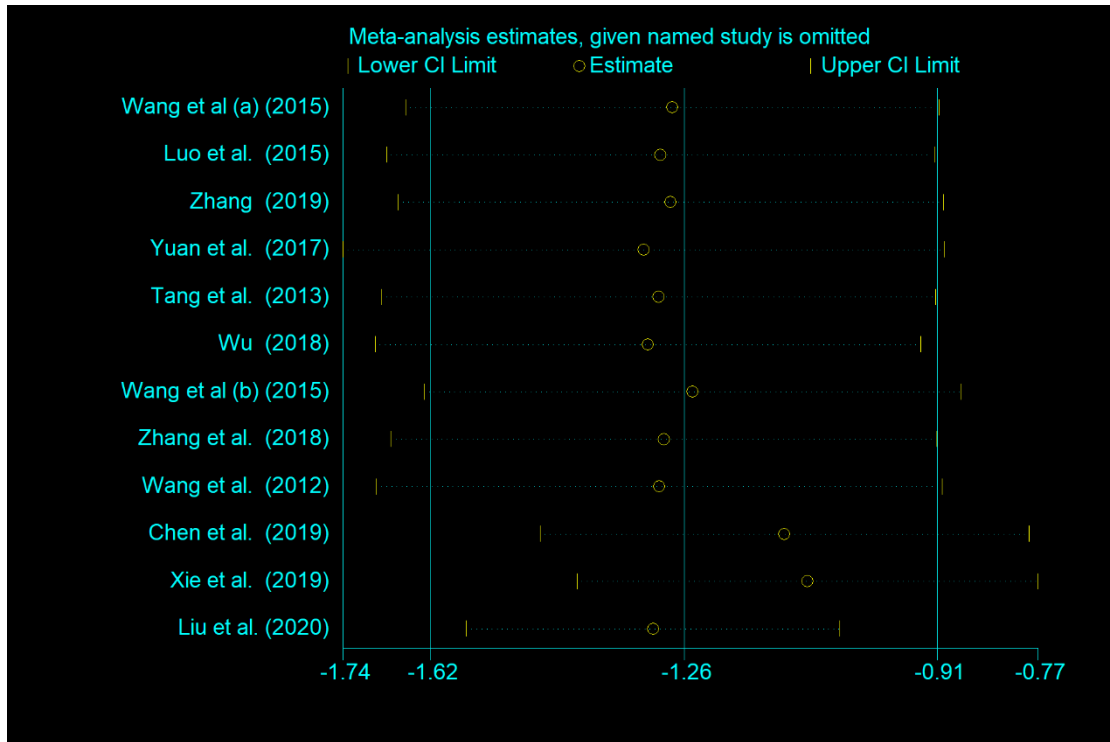



**e Figure 2. Sensitivity analysis of abnormal rate of EEG in patients with IE treated by combination of CHM and AEDs**

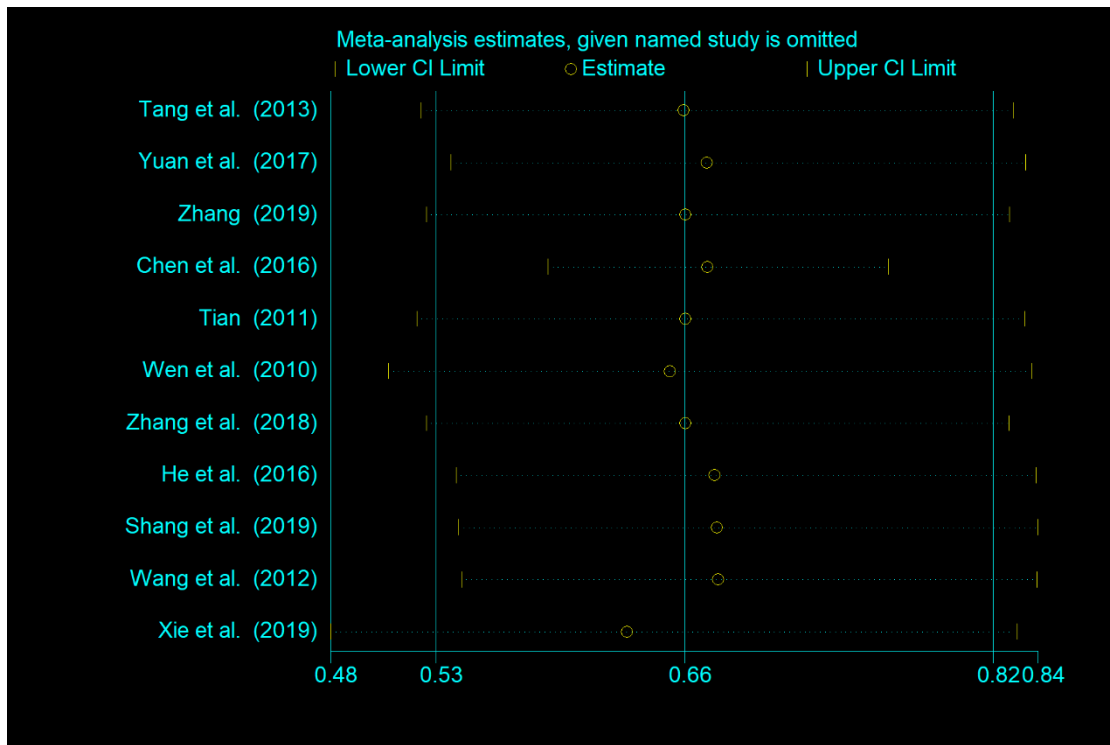

**e Figure 3. Sensitivity analysis of adverse events in patients with IE treated by combination of CHM and AEDs**

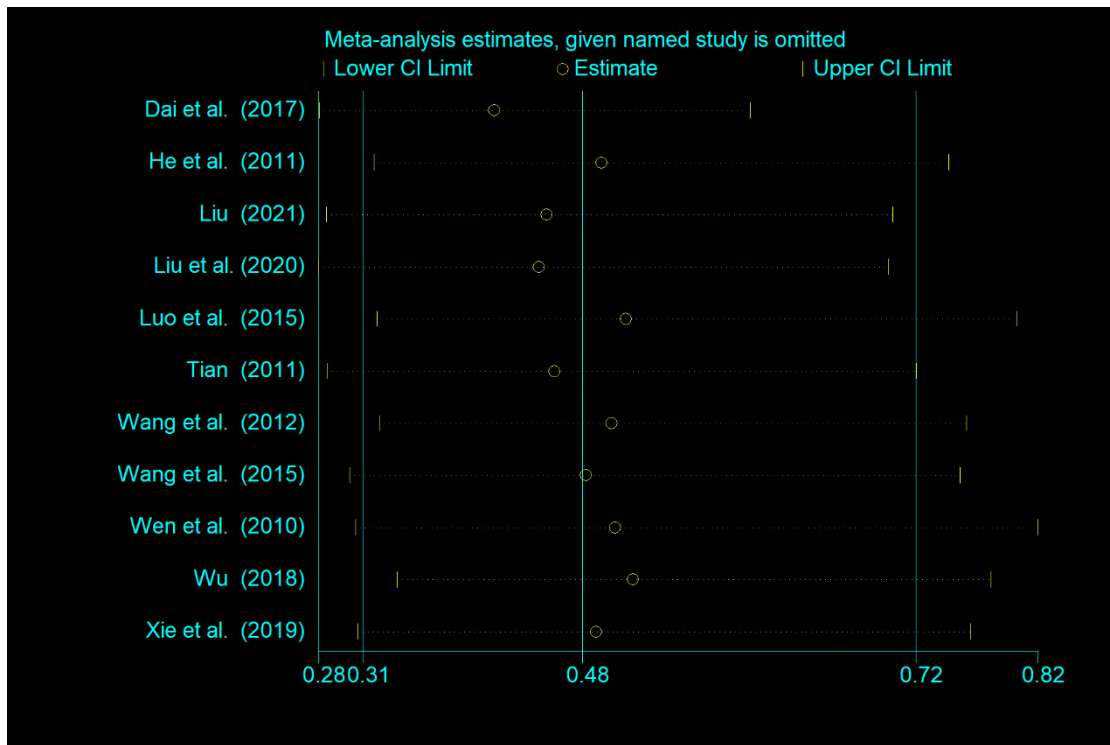

Supplement: Data_Sheet_1.PDF [file Data_Sheet_1.PDF]
